# Supplementary material for: The effectiveness of Soxhlet extraction as a simple method for GO rinsing as a precursor of high-quality graphene
Source: Royal Society of Chemistry journal article supplement (doi:10.1039/d1na00382h), 2021-01-01
Supplement: d1na00382h1.pdf [file d1na00382h1.pdf]

Supporting information to

**The effectiveness of Soxhlet extraction as a method of GO rinsing as  
precursor of high quality graphene**

Shimon Y.T. Trolles-Cavalcante<sup>1,+</sup>, Asmita Dutta<sup>1,+</sup>, Zdenek Sofer<sup>2</sup>, Arie Borenstein<sup>1,\*</sup>

<sup>1-</sup> Department of Chemical Science, Ariel University, Ariel

<sup>2-</sup> Department of Inorganic Chemistry, University of Chemistry and Technology Prague,  
Technicka 5, 166 28 Prague 6, Czech Republic

<sup>+-</sup> These authors contributed equally

<sup>\*</sup>- Corresponding author. arieb@ariel.ac.il

## Tables

**Table S1.** ICP data obtained for Soxhlet-washed and unwashed graphite-oxide.\*

|                | Ca      | K     | Mg    | Mn    | Na   |
|----------------|---------|-------|-------|-------|------|
| GO-<br>Soxhlet | <0.0047 | 1.68  | 0.054 | 1.70  | 1.03 |
| Unwashed GO    | 5.01    | 21.74 | 2.27  | 26.44 | 2.72 |

\* - All values in ppm.

The GO paste was taken directly from the reactor at the end of Hummer's method process and separated from the oxidative solution by centrifugation. The data show, therefore the impurities in the GO sample and not the reactants in the solution.

**Table S2.** Elemental analysis of graphite, graphite-oxide and laser-reduced GO.\*

|                | C     | H     | O     | N    | S    | O/C ratio |
|----------------|-------|-------|-------|------|------|-----------|
| Graphite       | 96.52 | 0.02  | 3.73  | 0    | 0.67 | 0.038     |
| GO-<br>Soxhlet | 30.54 | 2.62  | 65.73 | 0.06 | 0.03 | 2.152     |
| Reduced-<br>GO | 70.38 | 10.15 | 15.51 | 3.53 | 0.33 | 0.22      |

\* - All values in ppm.

**Table S3.** ICP data obtained for graphene oxide and laser reduced graphite-oxide.\*

|                | Fe  | K   | Mg  | Mn  | Na   |
|----------------|-----|-----|-----|-----|------|
| GO-<br>Soxhlet | 134 | 548 | 176 | 669 | 423  |
| rGO            | 166 | 360 | 152 | 534 | 1153 |

\* - All values in ppm.

**Table S4.** XPS analysis of soxhlet-washed, traditionally (centrifuge) washed and commercial graphite-oxide.

|             | C     | O     | S    | Ca           | P            | N            |
|-------------|-------|-------|------|--------------|--------------|--------------|
| Soxhlet     | 60.04 | 36.28 | 3.63 | 0.02         | Not detected | Not detected |
| Traditional | 53.15 | 38.01 | 5.93 | 0.92         | 0.99         | Not detected |
| Commercial  | 60.71 | 33.68 | 2.92 | Not detected | Not detected | 1.69         |

**Table S5.** ICP of DI water and paper-soaked DI water. Data in ppm for a single filter paper (5.55 grams).

|                       | Mg           |
|-----------------------|--------------|
| DI Water              | Not detected |
| Paper-soaked DI water | 10.55        |

The Mg content in the Soxhlet GO was relatively high (176 ppm). It was higher than in the GO produced in the same batch in Hummers' method washed by centrifugation and even higher than the unwashed sample. We assumed the source is in the Soxhlet process, and suspected the filter paper. To identify the source of the relatively high manganese in the Soxhlet washed GO we soaked the paper in hot DI water and measure the Mg content. Indeed, the Mg level was high, what proves that this impurity is originated from the paper. Using more clean paper will result in low Mg content.

## Figures

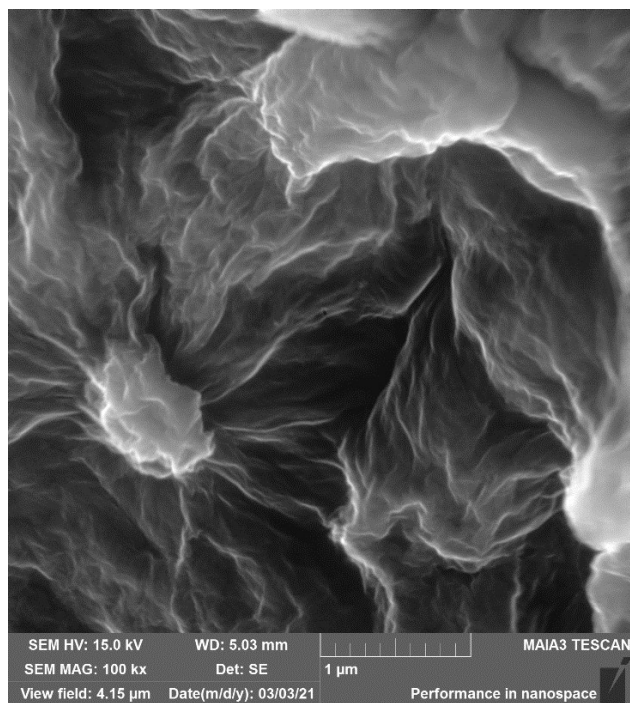

**Figure S1:** Typical scanning electron microscope (SEM) image of graphite-oxide after washing with Soxhlet extractor.

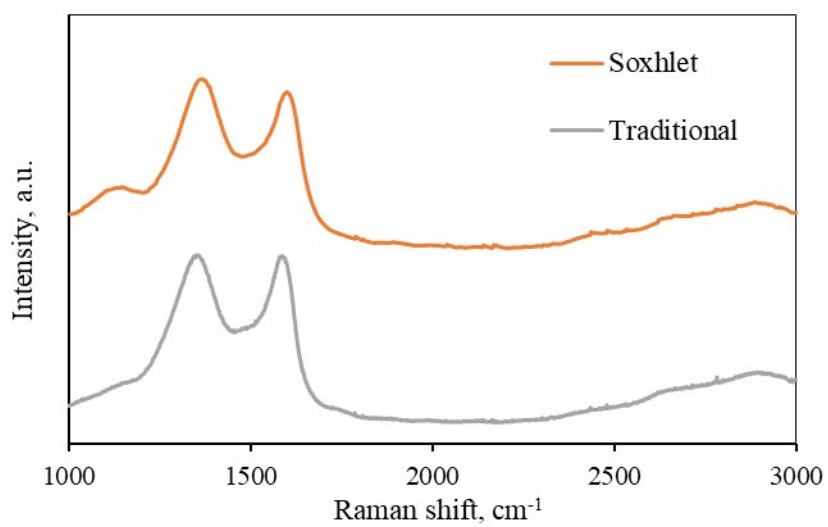

**Figure S2:** Raman spectra of Soxhlet- and traditionally- washed GO stimulated with 532 nm wavelength beam.

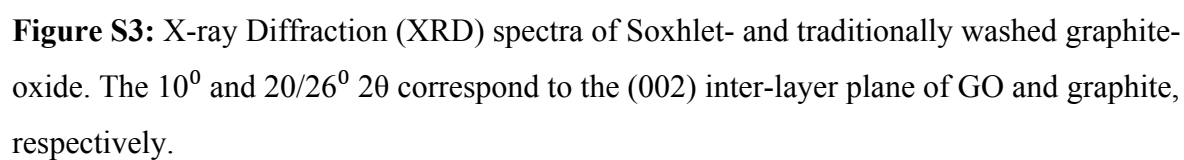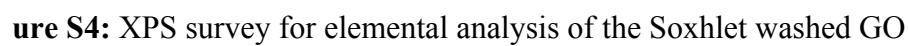

**Fig**

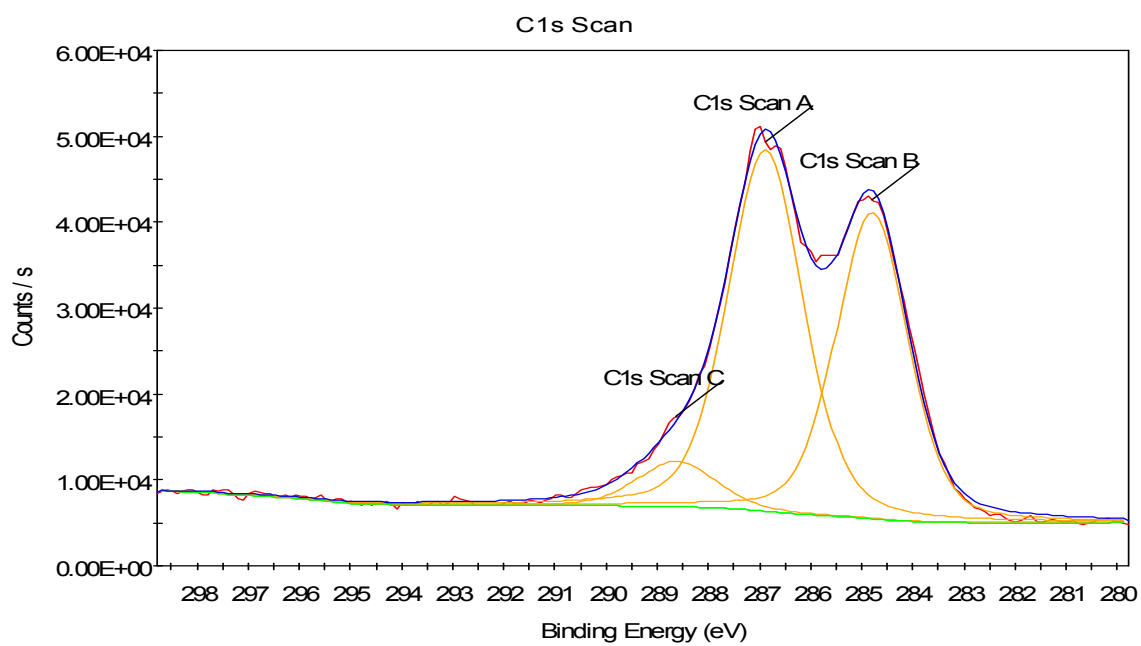

**Figure S5:** C1s scan and fitting for the Soxhlet washed GO.

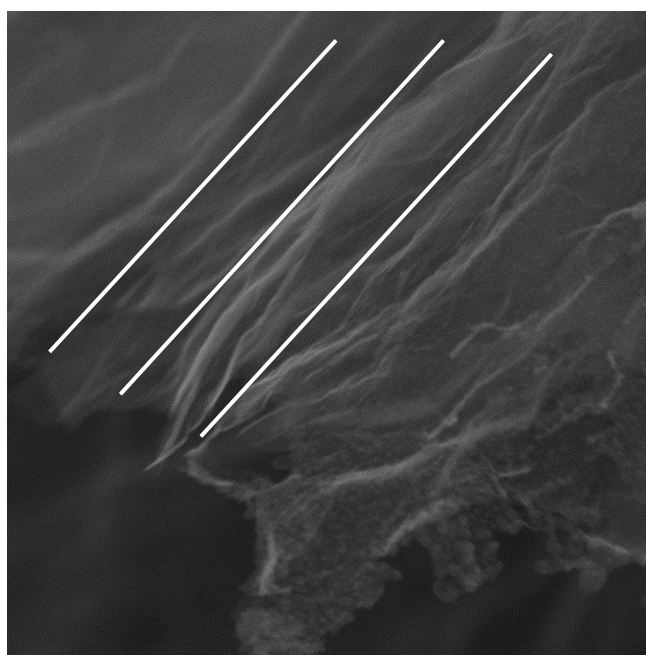

**Figure S6:** SEM image showing layered structure of reduced Graphite-oxide.

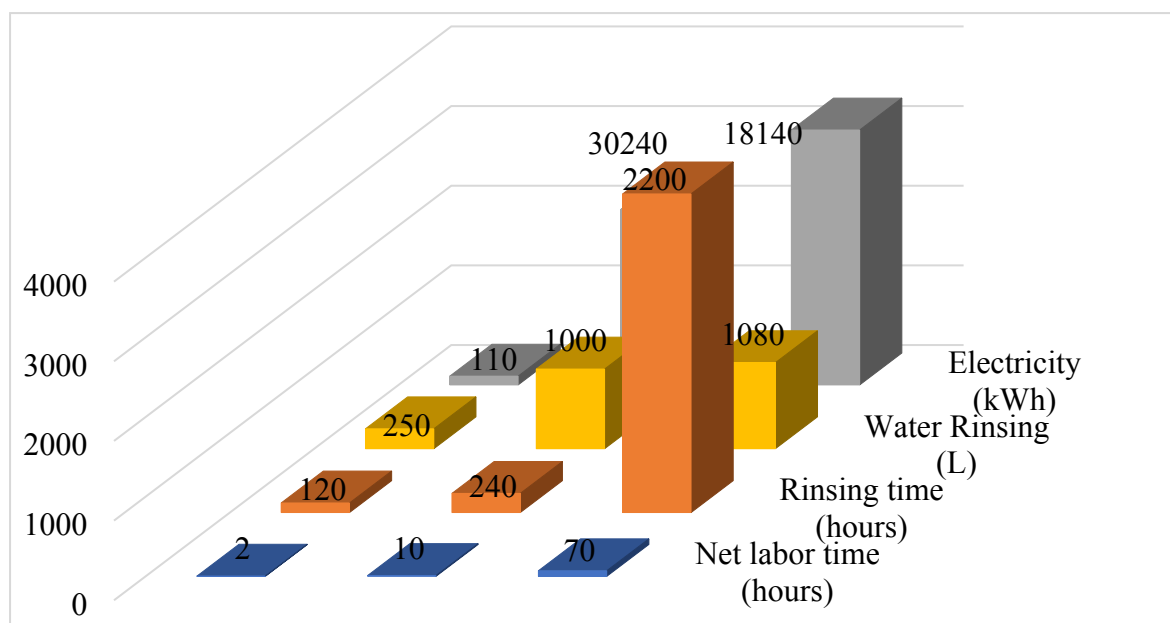

**Figure S7.** Comparison of rinsing requirements at different methods for 1kg graphite-oxide.
